# Supplementary material for: Genetic Diversity of Domestic Cat Hepadnavirus in Southern Taiwan
Source: MDPI journal article supplement (doi:10.3390/v15102128), 2023-10-20
Supplement: s1 [file s1]

**Supplemental Figure S1.** Cluster heatmap showing the pairwise identity of complete genomes of DCH collected from Taiwan and available sequences from GenBank. Sequence alignment (ClustalW), clustering (neighbor joining tree), and pairwise sequence identity calculations were performed in SDT v1.2.

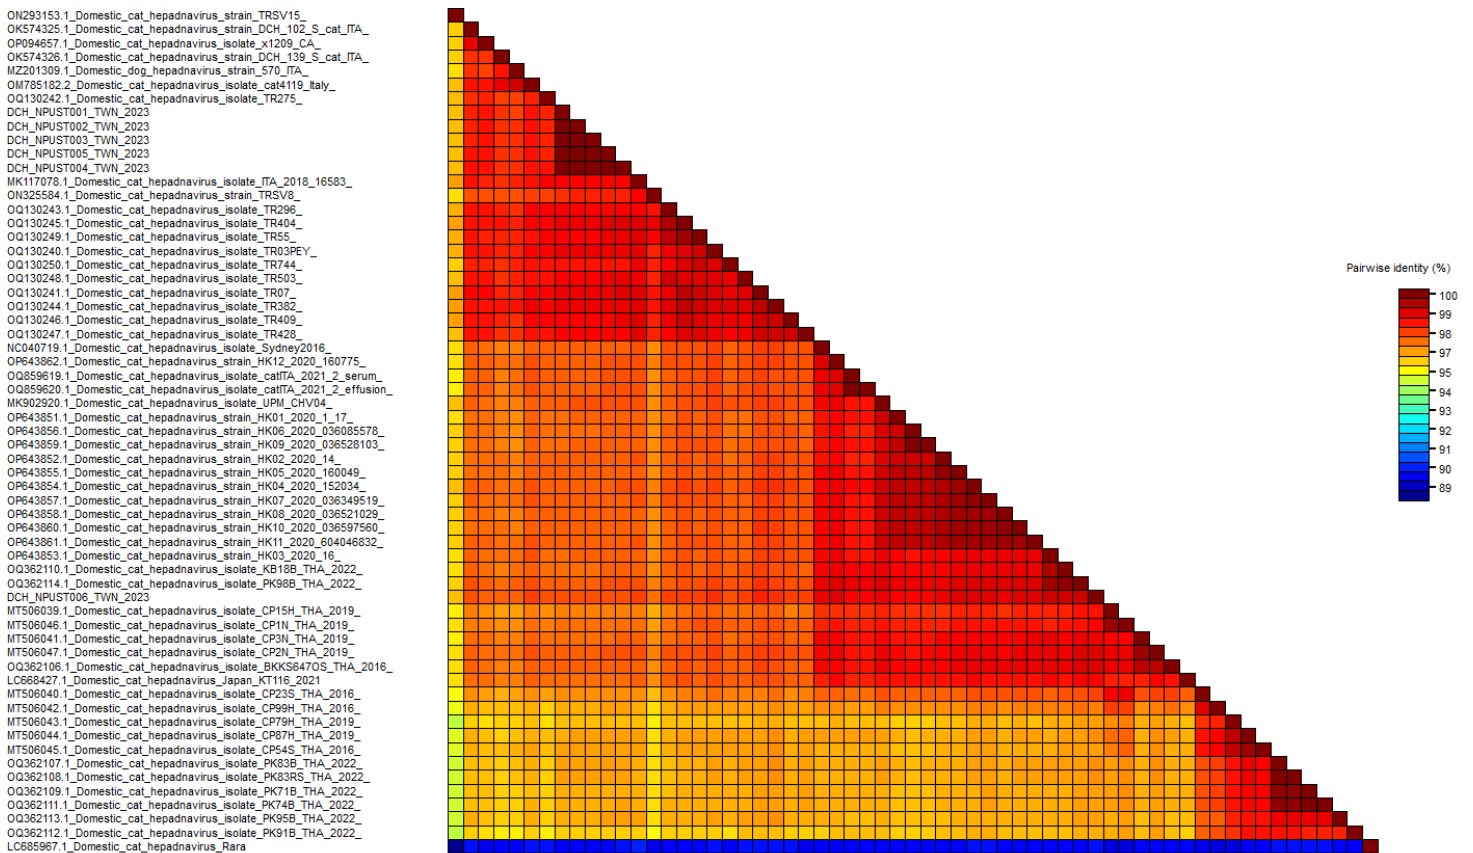

ON293153.1\_Domestic\_cat\_hepadnavirus\_strain\_TRSV15\_  
OK574325.1\_Domestic\_cat\_hepadnavirus\_strain\_DCH\_102\_S\_cat\_ITA\_  
OP094657.1\_Domestic\_cat\_hepadnavirus\_isolate\_x1209\_CA\_  
OK574326.1\_Domestic\_cat\_hepadnavirus\_strain\_DCH\_139\_S\_cat\_ITA\_  
MZ201309.1\_Domestic\_dog\_hepadnavirus\_strain\_570\_ITA\_  
OM785182.2\_Domestic\_cat\_hepadnavirus\_isolate\_cat4119\_Italy\_  
OQ130242.1\_Domestic\_cat\_hepadnavirus\_isolate\_TR275\_  
DCH\_NPUST001\_TWN\_2023  
DCH\_NPUST002\_TWN\_2023  
DCH\_NPUST003\_TWN\_2023  
DCH\_NPUST005\_TWN\_2023  
DCH\_NPUST004\_TWN\_2023  
UK117078.1\_Domestic\_cat\_hepadnavirus\_isolate\_ITA\_2018\_16583\_  
ON325584.1\_Domestic\_cat\_hepadnavirus\_strain\_TRSV8\_  
OQ130243.1\_Domestic\_cat\_hepadnavirus\_isolate\_TR296\_  
OQ130245.1\_Domestic\_cat\_hepadnavirus\_isolate\_TR404\_  
OQ130249.1\_Domestic\_cat\_hepadnavirus\_isolate\_TR55\_  
OQ130240.1\_Domestic\_cat\_hepadnavirus\_isolate\_TR03PEY\_  
OQ130250.1\_Domestic\_cat\_hepadnavirus\_isolate\_TR744\_  
OQ130248.1\_Domestic\_cat\_hepadnavirus\_isolate\_TR503\_  
OQ130241.1\_Domestic\_cat\_hepadnavirus\_isolate\_TR07\_  
OQ130244.1\_Domestic\_cat\_hepadnavirus\_isolate\_TR382\_  
OQ130246.1\_Domestic\_cat\_hepadnavirus\_isolate\_TR409\_  
OQ130247.1\_Domestic\_cat\_hepadnavirus\_isolate\_TR428\_  
NC040719.1\_Domestic\_cat\_hepadnavirus\_isolate\_Sydney2016\_  
OP843862.1\_Domestic\_cat\_hepadnavirus\_strain\_HK12\_2020\_160775\_  
OQ859619.1\_Domestic\_cat\_hepadnavirus\_isolate\_catITA\_2021\_2\_serum\_  
OQ859620.1\_Domestic\_cat\_hepadnavirus\_isolate\_catITA\_2021\_2\_effusion\_  
MK902920.1\_Domestic\_cat\_hepadnavirus\_isolate\_UPM\_CHV04\_  
OP843851.1\_Domestic\_cat\_hepadnavirus\_strain\_HK01\_2020\_1\_17\_  
OP843856.1\_Domestic\_cat\_hepadnavirus\_strain\_HK06\_2020\_036085578\_  
OP843859.1\_Domestic\_cat\_hepadnavirus\_strain\_HK09\_2020\_036528103\_  
OP843852.1\_Domestic\_cat\_hepadnavirus\_strain\_HK02\_2020\_14\_  
OP843855.1\_Domestic\_cat\_hepadnavirus\_strain\_HK05\_2020\_160049\_  
OP843854.1\_Domestic\_cat\_hepadnavirus\_strain\_HK04\_2020\_152034\_  
OP843857.1\_Domestic\_cat\_hepadnavirus\_strain\_HK07\_2020\_036349519\_  
OP843858.1\_Domestic\_cat\_hepadnavirus\_strain\_HK08\_2020\_036521029\_  
OP843860.1\_Domestic\_cat\_hepadnavirus\_strain\_HK10\_2020\_036597560\_  
OP843861.1\_Domestic\_cat\_hepadnavirus\_strain\_HK11\_2020\_604046832\_  
OP843853.1\_Domestic\_cat\_hepadnavirus\_strain\_HK03\_2020\_16\_  
OQ362110.1\_Domestic\_cat\_hepadnavirus\_isolate\_KB188\_THA\_2022\_  
OQ362114.1\_Domestic\_cat\_hepadnavirus\_isolate\_PK98B\_THA\_2022\_  
DCH\_NPUST006\_TWN\_2023  
MTS06039.1\_Domestic\_cat\_hepadnavirus\_isolate\_CP15H\_THA\_2019\_  
MTS06046.1\_Domestic\_cat\_hepadnavirus\_isolate\_CP1N\_THA\_2019\_  
MTS06041.1\_Domestic\_cat\_hepadnavirus\_isolate\_CP3N\_THA\_2019\_  
MTS06047.1\_Domestic\_cat\_hepadnavirus\_isolate\_CP2N\_THA\_2019\_  
OQ362106.1\_Domestic\_cat\_hepadnavirus\_isolate\_BKKS6470S\_THA\_2016\_  
LC068427.1\_Domestic\_cat\_hepadnavirus\_Japan\_KT116\_2021\_  
MTS06040.1\_Domestic\_cat\_hepadnavirus\_isolate\_CP2S\_THA\_2016\_  
MTS06042.1\_Domestic\_cat\_hepadnavirus\_isolate\_CP99H\_THA\_2016\_  
MTS06043.1\_Domestic\_cat\_hepadnavirus\_isolate\_CP79H\_THA\_2019\_  
MTS06044.1\_Domestic\_cat\_hepadnavirus\_isolate\_CP87H\_THA\_2019\_  
MTS06045.1\_Domestic\_cat\_hepadnavirus\_isolate\_CP54S\_THA\_2016\_  
OQ362107.1\_Domestic\_cat\_hepadnavirus\_isolate\_PK83B\_THA\_2022\_  
OQ362108.1\_Domestic\_cat\_hepadnavirus\_isolate\_PK83RS\_THA\_2022\_  
OQ362109.1\_Domestic\_cat\_hepadnavirus\_isolate\_PK71B\_THA\_2022\_  
OQ362111.1\_Domestic\_cat\_hepadnavirus\_isolate\_PK74B\_THA\_2022\_  
OQ362113.1\_Domestic\_cat\_hepadnavirus\_isolate\_PK95B\_THA\_2022\_  
OQ362112.1\_Domestic\_cat\_hepadnavirus\_isolate\_PK91B\_THA\_2022\_  
LC685967.1\_Domestic\_cat\_hepadnavirus\_Rara

**Supplemental Figure S2.** Alignment the preS1 amino acid sequences showing high conservation among DCH strains.

### A. preS1

| Species/Abbrev                                       | 1 | 2 | 3 | 4 | 5 | 6 | 7 | 8 | 9 | 10 | 11 | 12 | 13 | 14 | 15 | 16 | 17 | 18 | 19 | 20 | 21 | 22 | 23 | 24 | 25 | 26 | 27 | 28 | 29 | 30 | 31 | 32 | 33 | 34 | 35 | 36 | 37 | 38 | 39 | 40 | 41 | 42 | 43 | 44 | 45 | 46 | 47 | 48 | 49 | 50 | 51 | 52 | 53 | 54 | 55 | 56 | 57 | 58 | 59 | 60 | 61 | 62 | 63 | 64 | 65 | 66 | 67 | 68 | 69 | 70 | 71 | 72 | 73 | 74 | 75 | 76 | 77 | 78 | 79 | 80 | 81 | 82 | 83 | 84 | 85 | 86 | 87 | 88 | 89 | 90 | 91 | 92 | 93 | 94 | 95 | 96 | 97 | 98 | 99 | 100 |   |
|------------------------------------------------------|---|---|---|---|---|---|---|---|---|----|----|----|----|----|----|----|----|----|----|----|----|----|----|----|----|----|----|----|----|----|----|----|----|----|----|----|----|----|----|----|----|----|----|----|----|----|----|----|----|----|----|----|----|----|----|----|----|----|----|----|----|----|----|----|----|----|----|----|----|----|----|----|----|----|----|----|----|----|----|----|----|----|----|----|----|----|----|----|----|----|----|----|----|----|----|----|----|----|----|-----|---|
| 1 NC_003977.2 Hepatitis B virus (strain ayw) genome  | M | G | C | N | L | S | T | N | P | L  | G  | F  | F  | D  | H  | Q  | L  | D  | P  | A  | F  | A  | N  | S  | N  | P  | D  | W  | F  | N  | P  | K  | D  | H  | W  | P  | A  | N  | K  | V  | G  | A  | G  | F  | L  | G  | F  | T  | P  | P  | H  | G  | G  | L  | L  | -  | W  | S  | P  | Q  | A  | Q  | I  | L  | T  | T  | P  | A  | V  | A  | P  | P  | P  | A  | S  | T  | N  | R  | S  | G  | R  | G  | P  | T  | P  | L  | S  | P  | P  | L  | R  | N  | T  | H  | P  | Q  | A  |    |    |     |   |
| 2 LC519823.1 HBV genotype A B-H06-Ban                | M | G | T | N | L | S | V | P | N | P  | L  | G  | F  | F  | D  | H  | Q  | L  | D  | P  | A  | F  | A  | N  | S  | N  | P  | D  | W  | F  | N  | P  | K  | D  | H  | W  | P  | A  | N  | K  | V  | G  | A  | G  | F  | L  | G  | F  | T  | P  | P  | H  | G  | G  | L  | L  | -  | W  | S  | P  | Q  | A  | Q  | I  | L  | T  | T  | P  | A  | V  | A  | P  | P  | P  | A  | S  | T  | N  | R  | S  | G  | R  | G  | P  | T  | P  | L  | S  | P  | P  | L  | R  | N  | T  | H  | P  | Q  | A  |    |     |   |
| 3 LC004368.1 HBV genotype B isolate 292-Viet13       | M | G | T | N | L | S | V | P | N | P  | L  | G  | F  | F  | D  | H  | Q  | L  | D  | P  | A  | F  | A  | N  | S  | N  | P  | D  | W  | F  | N  | P  | K  | D  | H  | W  | P  | A  | N  | K  | V  | G  | A  | G  | F  | L  | G  | F  | T  | P  | P  | H  | G  | G  | L  | L  | -  | W  | S  | P  | Q  | A  | Q  | I  | L  | T  | T  | P  | A  | V  | A  | P  | P  | P  | A  | S  | T  | N  | R  | S  | G  | R  | G  | P  | T  | P  | L  | S  | P  | P  | L  | R  | N  | T  | H  | P  | Q  | A  |    |     |   |
| 4 LC522131.1 HBV genotype C1 C17148-H01              | M | G | T | N | L | S | V | P | N | P  | L  | G  | F  | F  | P  | D  | H  | Q  | L  | D  | P  | A  | F  | A  | N  | S  | N  | P  | D  | W  | F  | N  | P  | K  | D  | H  | W  | P  | A  | N  | K  | V  | G  | A  | G  | F  | L  | G  | F  | T  | P  | P  | H  | G  | G  | L  | L  | -  | W  | S  | P  | Q  | A  | Q  | I  | L  | T  | T  | P  | A  | V  | A  | P  | P  | P  | A  | S  | T  | N  | R  | S  | G  | R  | G  | P  | T  | P  | L  | S  | P  | P  | L  | R  | N  | T  | H  | P  | Q  | A  |     |   |
| 5 HE974366.1 HBV genotype F2 isolate Mart-B18        | M | G | N | L | S | V | P | N | P | L  | G  | F  | F  | D  | H  | Q  | L  | D  | P  | A  | F  | A  | N  | S  | S  | P  | D  | W  | F  | N  | T  | N  | K  | S  | W  | P  | M  | A  | N  | K  | V  | G  | A  | G  | F  | L  | G  | F  | T  | P  | P  | H  | G  | G  | L  | L  | -  | W  | S  | P  | Q  | A  | Q  | I  | L  | T  | T  | P  | A  | V  | A  | P  | P  | P  | A  | S  | T  | N  | R  | S  | G  | R  | G  | P  | T  | P  | L  | S  | P  | P  | L  | R  | N  | T  | H  | P  | Q  | A  |    |     |   |
| 6 NC_043528.1 Capuchin monkey hepatitis B virus iso1 | M | G | L | N | O | S | T | I | N | P  | L  | G  | F  | F  | P  | S  | H  | Q  | L  | D  | P  | L  | F  | K  | A  | N  | S  | P  | A  | D  | W  | F  | N  | P  | H  | K  | P  | W  | P  | S  | A  | H  | E  | V  | P  | V  | G  | A  | G  | F  | L  | G  | F  | T  | P  | P  | H  | G  | G  | L  | L  | -  | W  | N  | P  | S  | Q  | G  | V  | T  | L  | L  | P  | K  | P  | A  | Q  | L  | P  | N  | R  | N  | S  | A  | R  | V  | P  | T  | P  | L  | P  | P  | L  | R  | N  | T  | H  | P  | Q  | A   |   |
| 7 NC_028129.1 Woolly monkey hepatitis B virus clone1 | M | G | L | N | O | S | T | I | N | P  | L  | G  | F  | F  | P  | S  | H  | Q  | L  | D  | P  | L  | F  | K  | A  | N  | S  | P  | A  | D  | W  | F  | N  | P  | H  | K  | P  | W  | P  | S  | A  | H  | E  | V  | P  | V  | G  | A  | G  | F  | L  | G  | F  | T  | P  | P  | H  | G  | G  | L  | L  | -  | W  | S  | S  | O  | A  | Q  | I  | S  | T  | V  | T  | P  | T  | P  | P  | P  | S  | T  | N  | R  | G  | K  | R  | K  | P  | T  | A  | P  | L  | P  | P  | L  | R  | N  | T  | H  | P  | Q   | A |
| 8 NC_040719.1 DCH isolate Sydney2016                 | M | G | A | N | O | S | I | N | P | L  | G  | F  | F  | P  | R  | R  | N  | L  | -  | L  | T  | P  | A  | G  | T  | L  | G  | D  | F  | H  | N  | P  | L  | K  | D  | P  | W  | P  | O  | S  | S  | H  | S  | R  | G  | A  | W  | G  | G  | F  | V  | P  | P  | H  | G  | L  | L  | G  | S  | L  | S  | F  | A  | T  | Q  | G  | V  | V  | S  | A  | H  | P  | I  | T  | N  | P  | P  | -  | R  | K  | K  | G  | R  | G  | P  | T  | L  | T  | P  | P  | V  | R  | I  | T  | H  | P  | Q  | A  |    |     |   |
| 9 OP094657.1 DCH isolate x1209_CA                    | M | G | A | N | O | S | I | N | P | L  | G  | F  | F  | P  | R  | R  | N  | L  | -  | L  | T  | P  | A  | G  | T  | L  | G  | D  | F  | H  | N  | P  | L  | K  | D  | P  | W  | P  | O  | S  | S  | H  | S  | R  | G  | A  | W  | G  | G  | F  | V  | P  | P  | H  | G  | L  | L  | G  | S  | L  | S  | F  | A  | T  | Q  | G  | V  | V  | S  | A  | H  | P  | I  | T  | N  | P  | P  | -  | R  | K  | K  | G  | R  | G  | P  | T  | L  | T  | P  | P  | V  | R  | I  | T  | H  | P  | Q  | A  |    |     |   |
| 10 MT506046.1 DCH isolate CP1N_THA2019               | M | G | A | N | O | S | I | N | P | L  | G  | F  | F  | P  | -  | G  | H  | N  | L  | -  | L  | T  | P  | A  | G  | T  | L  | G  | D  | F  | H  | N  | P  | L  | K  | D  | P  | W  | P  | O  | S  | S  | H  | S  | R  | G  | A  | W  | G  | G  | F  | V  | P  | P  | H  | G  | L  | L  | G  | S  | L  | S  | F  | A  | T  | Q  | G  | V  | V  | A  | H  | P  | I  | T  | N  | P  | P  | -  | R  | K  | K  | G  | R  | G  | P  | T  | L  | T  | P  | P  | V  | R  | I  | T  | H  | P  | Q  | A  |    |     |   |
| 11 MT506047.1 DCH isolate CP2N_THA2019               | M | G | A | N | O | S | I | N | P | L  | G  | F  | F  | P  | R  | R  | N  | L  | -  | L  | T  | P  | A  | G  | T  | L  | G  | D  | F  | H  | N  | P  | L  | K  | D  | P  | W  | P  | O  | S  | S  | H  | S  | R  | G  | A  | W  | G  | G  | F  | V  | P  | P  | H  | G  | L  | L  | G  | S  | L  | S  | F  | A  | T  | Q  | G  | V  | V  | S  | A  | H  | P  | I  | T  | N  | P  | P  | -  | R  | K  | K  | G  | R  | G  | P  | T  | L  | T  | P  | P  | V  | R  | I  | T  | H  | P  | Q  | A  |    |     |   |
| 12 MT506041.1 DCH isolate CP3N_THA2019               | M | G | A | N | O | S | I | N | P | L  | G  | F  | F  | P  | R  | R  | N  | L  | -  | L  | T  | P  | A  | G  | T  | L  | G  | D  | F  | H  | N  | P  | L  | K  | D  | P  | W  | P  | O  | S  | S  | H  | S  | R  | G  | A  | W  | G  | G  | F  | V  | P  | P  | H  | G  | L  | L  | G  | S  | L  | S  | F  | A  | T  | Q  | G  | V  | V  | S  | A  | H  | P  | I  | T  | N  | P  | P  | -  | R  | K  | K  | G  | R  | G  | P  | T  | L  | T  | P  | P  | V  | R  | I  | T  | H  | P  | Q  | A  |    |     |   |
| 13 MT506039.1 DCH isolate CP15H_THA2019              | M | G | A | N | O | S | I | N | P | L  | G  | F  | F  | P  | R  | R  | N  | L  | -  | L  | T  | P  | A  | G  | T  | L  | G  | D  | F  | H  | N  | P  | L  | K  | D  | P  | W  | P  | O  | S  | S  | H  | S  | R  | G  | A  | W  | G  | G  | F  | V  | P  | P  | H  | G  | L  | L  | G  | S  | L  | S  | F  | A  | T  | Q  | G  | V  | V  | A  | H  | P  | I  | T  | N  | P  | P  | -  | R  | K  | K  | G  | R  | G  | P  | T  | L  | T  | P  | P  | V  | R  | I  | T  | H  | P  | Q  | A  |    |    |     |   |
| 14 MT506040.1 DCH isolate CP23S_THA2016              | M | G | A | N | O | S | I | N | P | L  | G  | F  | F  | P  | R  | R  | N  | L  | -  | L  | T  | P  | A  | G  | T  | L  | G  | D  | F  | H  | N  | P  | L  | K  | D  | P  | W  | P  | O  | S  | S  | H  | S  | R  | G  | A  | W  | G  | G  | F  | V  | P  | P  | H  | G  | L  | L  | G  | S  | L  | S  | F  | A  | T  | Q  | G  | V  | V  | S  | A  | H  | P  | I  | T  | N  | P  | P  | -  | R  | K  | K  | G  | R  | G  | P  | T  | L  | T  | P  | P  | V  | R  | I  | T  | H  | P  | Q  | A  |    |     |   |
| 15 MT506045.1 DCH isolate CP54S_THA2016              | M | G | A | N | O | S | I | N | P | L  | G  | F  | F  | P  | R  | R  | N  | L  | -  | L  | T  | P  | A  | G  | T  | L  | G  | D  | F  | H  | N  | P  | L  | K  | D  | P  | W  | P  | O  | S  | S  | H  | S  | R  | G  | A  | W  | G  | G  | F  | V  | P  | P  | H  | G  | L  | L  | G  | S  | L  | S  | F  | A  | T  | Q  | G  | V  | V  | S  | A  | H  | P  | I  | T  | N  | P  | P  | -  | R  | K  | K  | G  | R  | G  | P  | T  | L  | T  | P  | P  | V  | R  | I  | T  | H  | P  | Q  | A  |    |     |   |
| 16 MT506043.1 DCH isolate CP79H_THA2019              | M | G | A | N | O | S | I | N | P | L  | G  | F  | F  | P  | R  | R  | N  | L  | -  | L  | T  | P  | A  | G  | T  | L  | G  | D  | F  | H  | N  | P  | L  | K  | D  | P  | W  | P  | O  | S  | S  | H  | S  | R  | G  | A  | W  | G  | G  | F  | V  | P  | P  | H  | G  | L  | L  | G  | S  | L  | S  | F  | A  | T  | Q  | G  | V  | V  | S  | A  | H  | P  | I  | T  | N  | P  | P  | -  | R  | K  | K  | G  | R  | G  | P  | T  | L  | T  | P  | P  | V  | R  | I  | T  | H  | P  | Q  | A  |    |     |   |
| 17 MT506044.1 DCH isolate CP87H_THA2019              | M | G | A | N | O | S | I | N | P | L  | G  | F  | F  | P  | R  | R  | N  | L  | -  | L  | T  | P  | A  | G  | T  | L  | G  | D  | F  | H  | N  | P  | L  | K  | D  | P  | W  | P  | O  | S  | S  | H  | S  | R  | G  | A  | W  | G  | G  | F  | V  | P  | P  | H  | G  | L  | L  | G  | S  | L  | S  | F  | A  | T  | Q  | G  | V  | V  | S  | A  | H  | P  | I  | T  | N  | P  | P  | -  | R  | K  | K  | G  | R  | G  | P  | T  | L  | T  | P  | P  | V  | R  | I  | T  | H  | P  | Q  | A  |    |     |   |
| 18 MT506042.1 DCH isolate CP99H_THA2016              | M | G | A | N | O | S | I | N | P | L  | G  | F  | F  | P  | R  | R  | N  | L  | -  | L  | T  | P  | A  | G  | T  | L  | G  | D  | F  | H  | N  | P  | L  | K  | D  | P  | W  | P  | O  | S  | S  | H  | S  | R  | G  | A  | W  | G  | G  | F  | V  | P  | P  | H  | G  | L  | L  | G  | S  | L  | S  | F  | A  | T  | Q  | G  | V  | V  | S  | A  | H  | P  | I  | T  | N  | P  | P  | -  | R  | K  | K  | G  | R  | G  | P  | T  | L  | T  | P  | P  | V  | R  | I  | T  | H  | P  | Q  | A  |    |     |   |
| 19 OK574325.1 DCH strain DCH/102_S/catt16            | M | G | T | N | O | S | I | N | P | L  | G  | F  | F  | P  | R  | R  | N  | L  | -  | L  | T  | P  | A  | G  | T  | L  | G  | D  | F  | H  | N  | P  | L  | K  | D  | P  | W  | P  | O  | S  | S  | H  | S  | R  | G  | A  | W  | G  | G  | F  | V  | P  | P  | H  | G  | L  | L  | G  | S  | L  | S  | F  | A  | T  | Q  | G  | V  | V  | S  | A  | H  | P  | I  | T  | N  | P  | P  | -  | R  | K  | K  | G  | R  | G  | P  | T  | L  | T  | P  | P  | V  | R  | I  | T  | H  | P  | Q  | A  |    |     |   |
| 20 OK574326.1 DCH strain DCH/139_S/catt16            | M | G | A | N | O | S | I | N | P | L  | G  | F  | F  | P  | R  | R  | N  | L  | -  | L  | T  | P  | A  | G  | T  | L  | G  | D  | F  | H  | N  | P  | L  | K  | D  | P  | W  | P  | O  | S  | S  | H  | S  | R  | G  | A  | W  | G  | G  | F  | V  | P  | P  | H  | G  | L  | L  | G  | S  | L  | S  | F  | A  | T  | Q  | G  | V  | V  | S  | A  | H  | P  | I  | T  | N  | P  | P  | -  | R  | K  | K  | G  | R  | G  | P  | T  | L  | T  | P  | P  | V  | R  | I  | T  | H  | P  | Q  | A  |    |     |   |
| 21 MK117078.1 DCH isolate ITA/2018/165-83            | M | G | A | N | O | S | I | N | P | L  | G  | F  | F  | P  | R  | R  | N  | L  | -  | L  | T  | P  | A  | G  | T  | L  | G  | D  | F  | H  | N  | P  | L  | K  | D  | P  | W  | P  | O  | S  | S  | H  | S  | R  | G  | A  | W  | G  | G  | F  | V  | P  | P  | H  | G  | L  | L  | G  | S  | L  | S  | F  | A  | T  | Q  | G  | V  | V  | S  | A  | H  | P  | I  | T  | N  | P  | P  | -  | R  | K  | K  | G  | R  | G  | P  | T  | L  | T  | P  | P  | V  | R  | I  | T  | H  | P  | Q  | A  |    |     |   |
| 22 M2201309.1 DCH strain 5701TA                      | M | G | A | N | O | S | I | N | P | L  | G  | F  | F  | P  | R  | R  | N  | L  | -  | L  | T  | P  | A  | G  | T  | L  | G  | D  | F  | H  | N  | P  | L  | K  | D  | P  | W  | P  | O  | S  | S  | H  | S  | R  | G  | A  | W  | G  | G  | F  | V  | P  | P  | H  | G  | L  | L  | G  | S  | L  | S  | F  | A  | T  | Q  | G  | V  | V  | S  | A  | H  | P  | I  | T  | N  | P  | P  | -  | R  | K  | K  | G  | R  | G  | P  | T  | L  | T  | P  | P  | V  | R  | I  | T  | H  | P  | Q  | A  |    |     |   |
| 23 LC668427.1 DCH isolate Japan/KT116/2021           | M | G | A | N | O | S | I | N | P |    |    |    |    |    |    |    |    |    |    |    |    |    |    |    |    |    |    |    |    |    |    |    |    |    |    |    |    |    |    |    |    |    |    |    |    |    |    |    |    |    |    |    |    |    |    |    |    |    |    |    |    |    |    |    |    |    |    |    |    |    |    |    |    |    |    |    |    |    |    |    |    |    |    |    |    |    |    |    |    |    |    |    |    |    |    |    |    |    |    |     |   |

**Supplemental Figure S3.** Comparison of the phylogenetic trees generated from a previous report identifying Clades A1 and A2 under Genotype A and the updated tree that included more recently reported strains, particularly from Türkiye and Taiwan. Previously identified members of Clade A2 were distributed into separate branches instead of one robustly supported monophyletic clade.

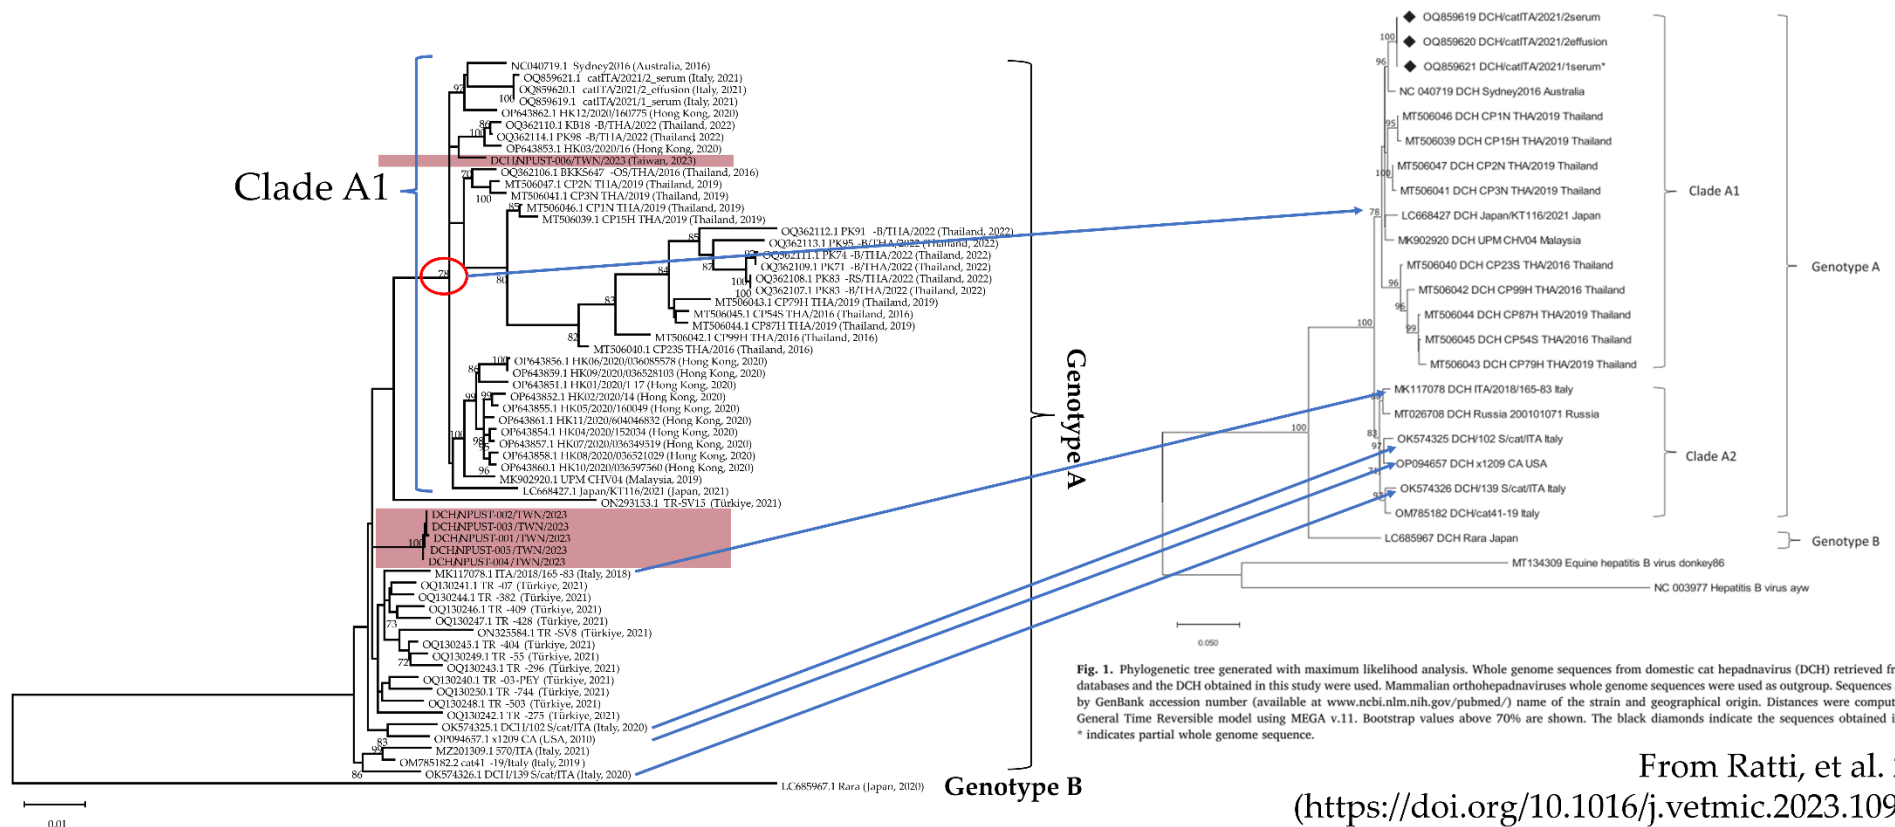

Figure 1 (from the main text)

**Fig. 1.** Phylogenetic tree generated with maximum likelihood analysis. Whole genome sequences from domestic cat hepadnavirus (DCH) retrieved from GenBank databases and the DCH obtained in this study were used. Mammalian orthohepadnaviruses whole genome sequences were used as outgroup. Sequences are indicated by GenBank accession number (available at [www.ncbi.nlm.nih.gov/pubmed/](http://www.ncbi.nlm.nih.gov/pubmed/)) name of the strain and geographical origin. Distances were computed using the General Time Reversible model using MEGA v.11. Bootstrap values above 70% are shown. The black diamonds indicate the sequences obtained in this study; \* indicates partial whole genome sequence.

From Ratti, et al. 2023  
(<https://doi.org/10.1016/j.vetmic.2023.109828>)

**Supplemental Figure S4.** Phylogenetic trees were constructed using the protein sequences for (a) polymerase, (b) surface, (c) core, and (d) X proteins of DCH strains from Taiwan and available sequences from GenBank. The tree was created by constructing a maximum likelihood tree with the best fit and chosen model according to the Bayesian information criterion using IQTREE v.2.2.2.3. Bootstrap values above 70% are shown. The scale bar indicates the number of substitutions per site.

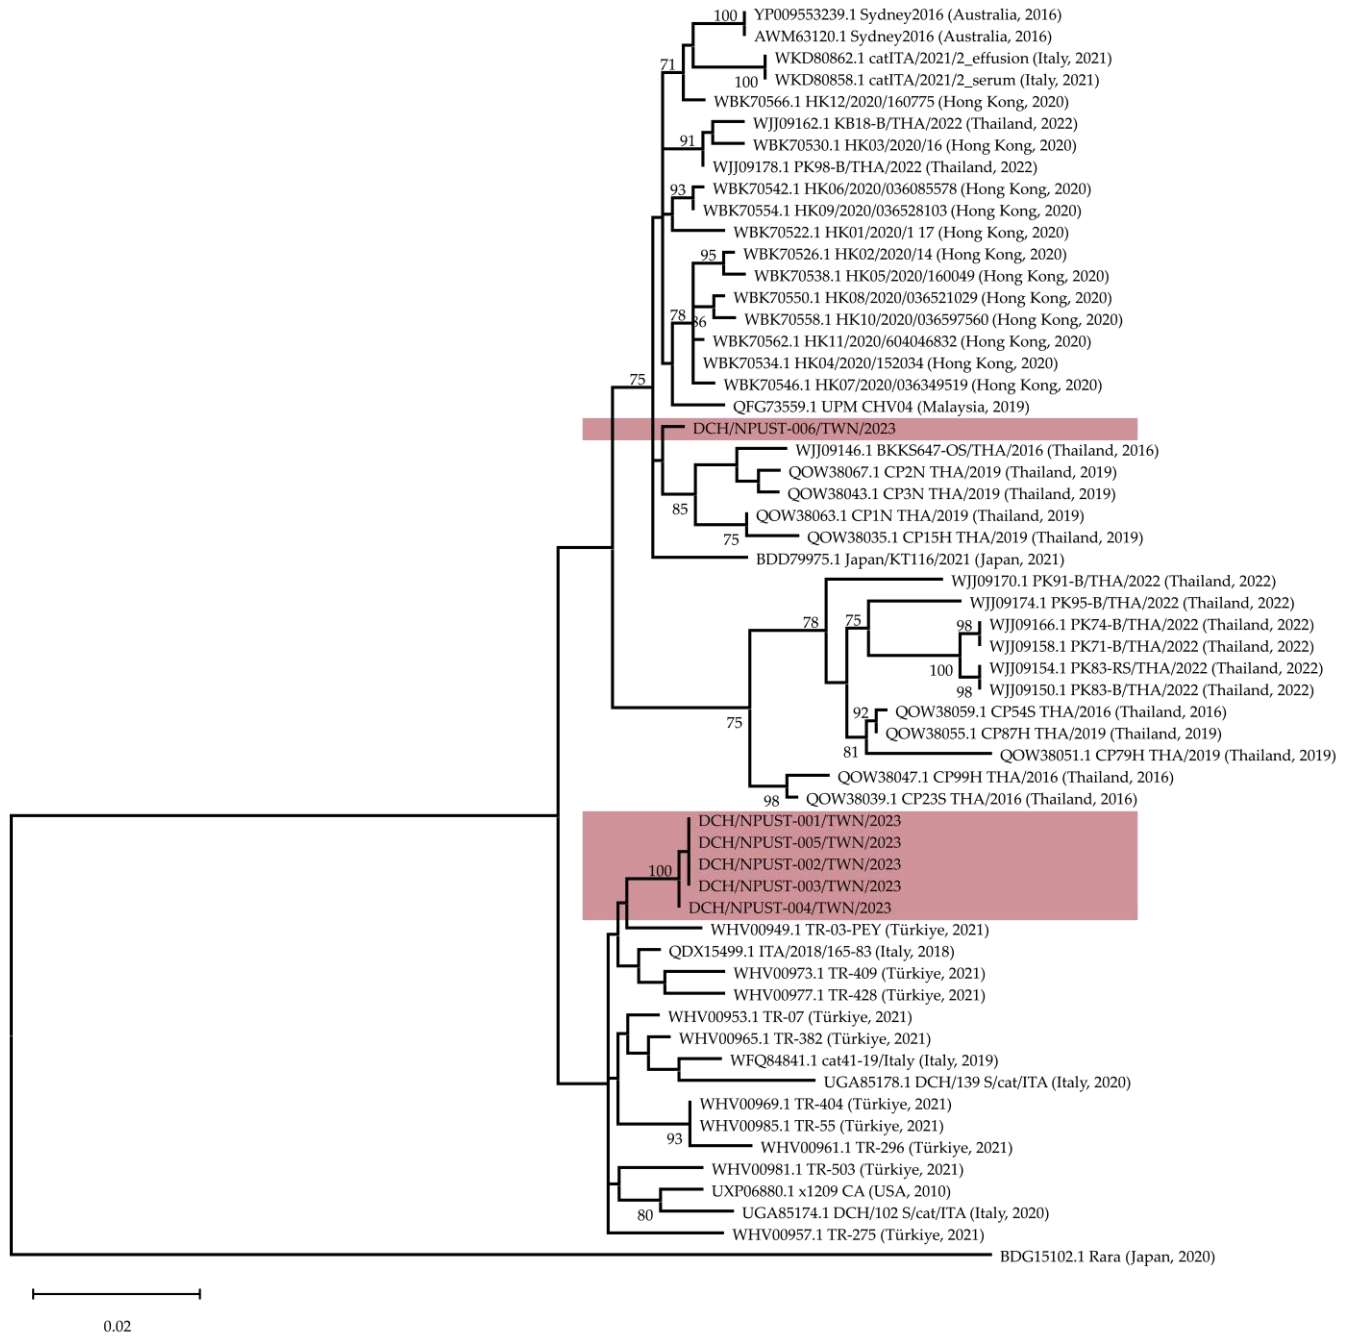

(a) Polymerase protein

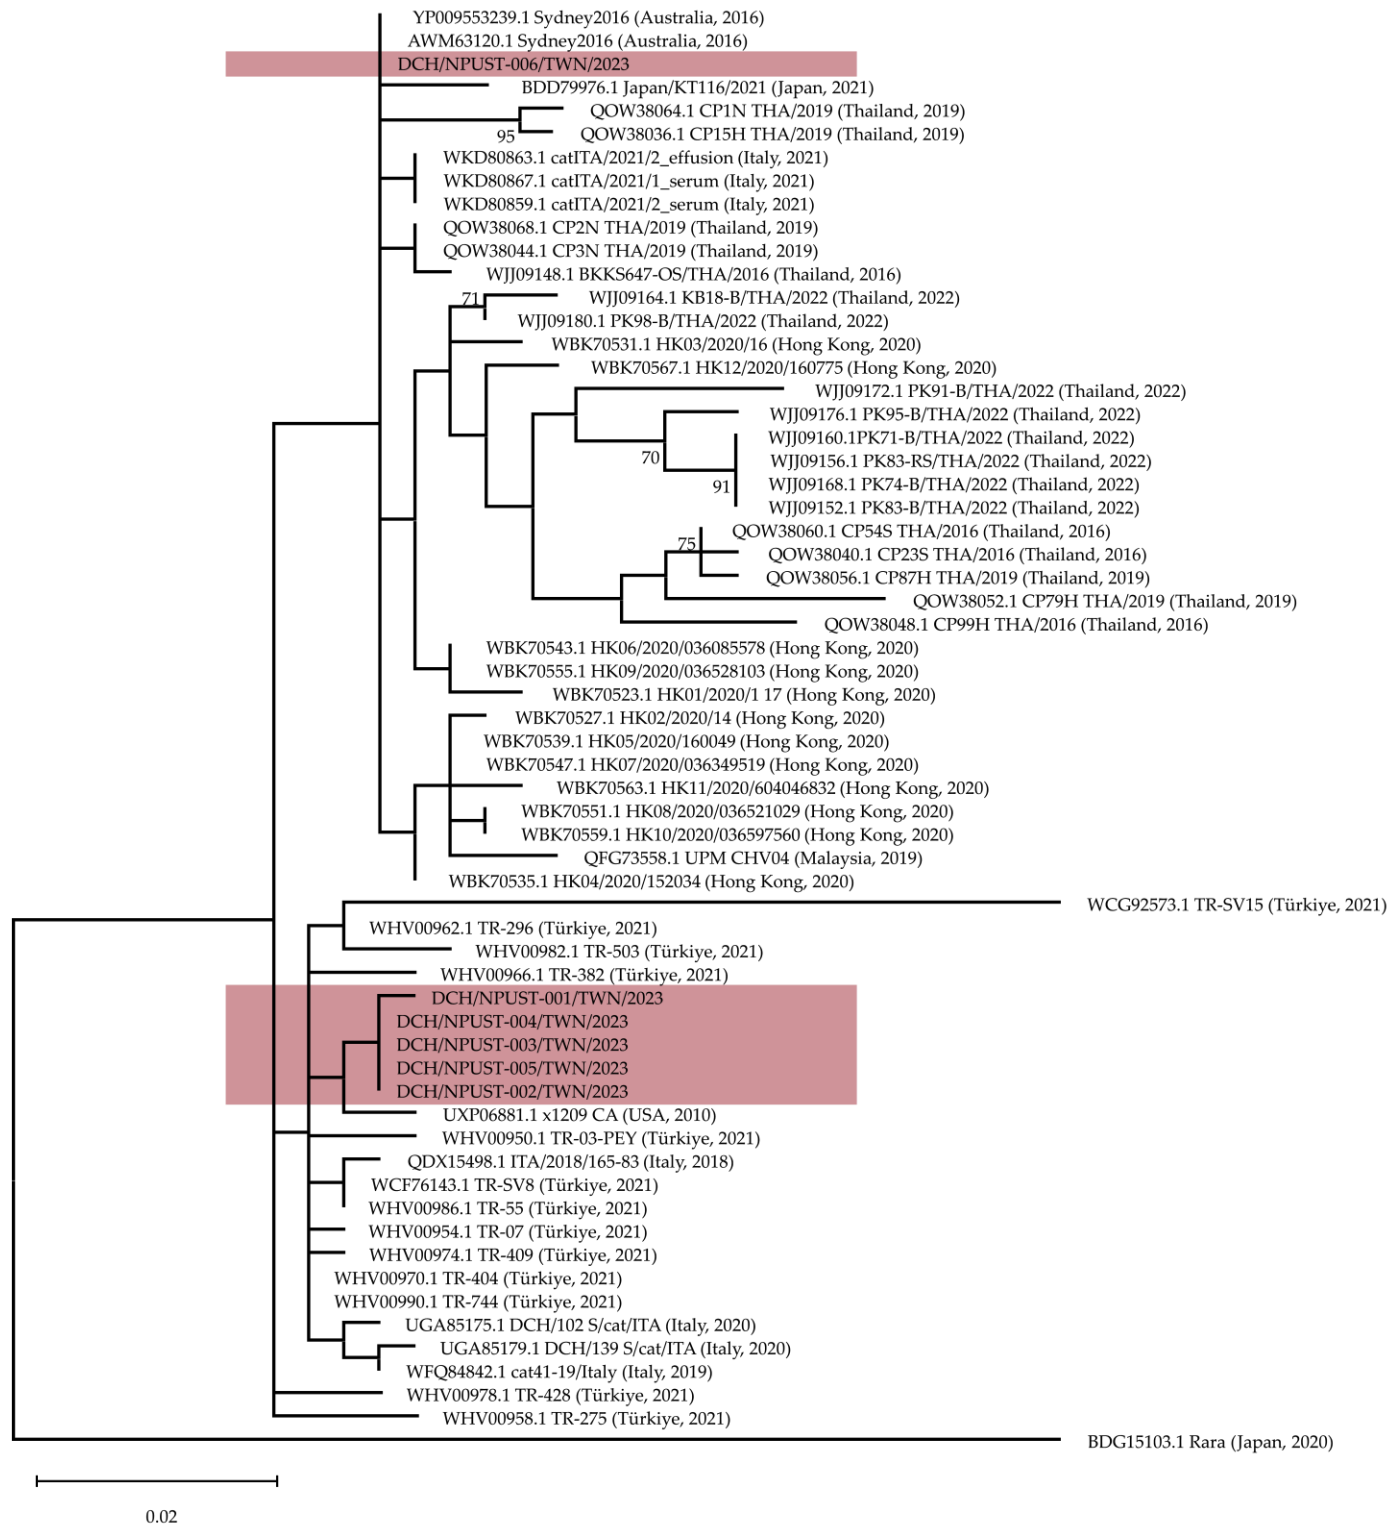

(b) Surface protein

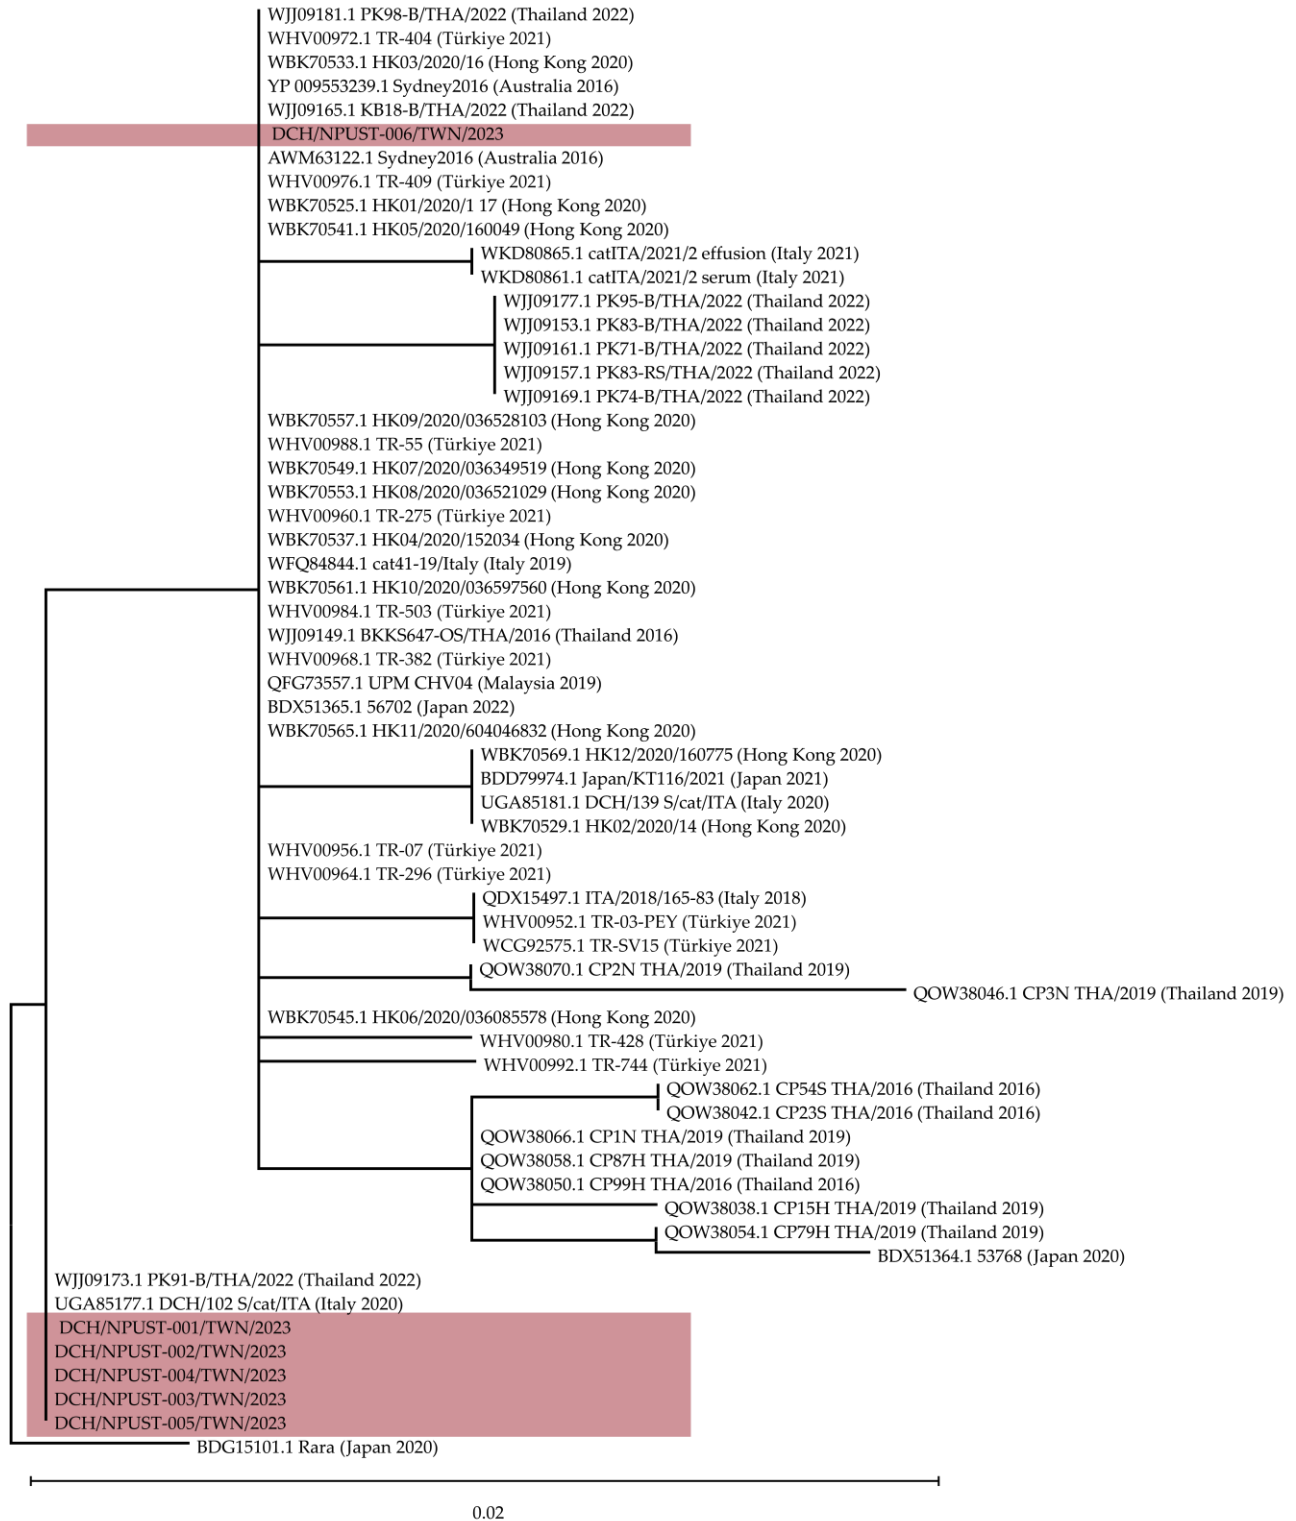

(c) Core protein

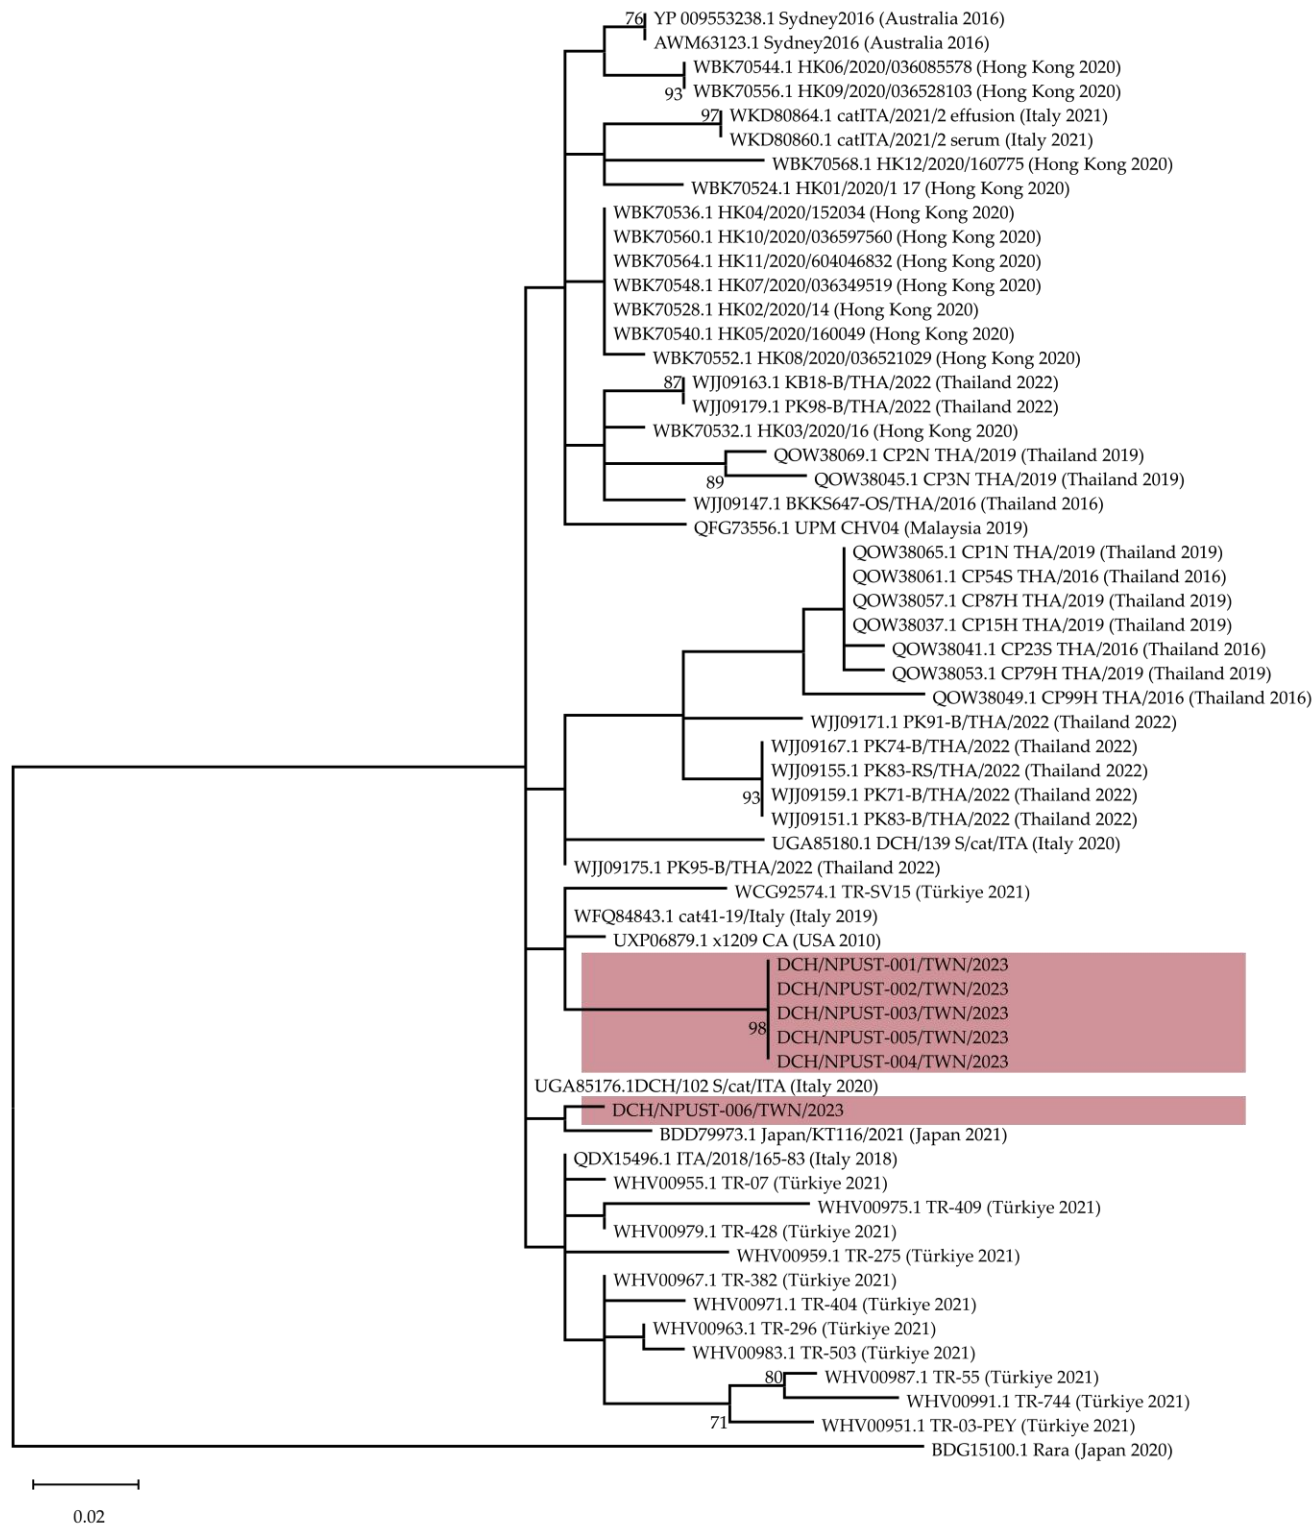

(d) X protein
